# Supplementary material for: Spike Density Quantitative Trait Loci Detection and Analysis in Tetraploid and Hexaploid Wheat Recombinant Inbred Line Populations
Source: Front Plant Sci. 2021 Dec 16;12:796397. doi: 10.3389/fpls.2021.796397 (PMC8716915; doi:10.3389/fpls.2021.796397)
Supplement: Supplementary file 4 [file Table_4.XLSX]

## Sheet: Sheet1
Supplementary Table 4a Quantitative trait loci (QTL) detected by the QTL-by-Environment interaction module in the 2SY population
Chromosome	Position	LeftMarker	RightMarker	LOD	LOD(A)	LOD(AbyE)	PVE	PVE(A)	PVE(AbyE)	Add	AbyE_01	AbyE_02	AbyE_03	AbyE_04	AbyE_05	AbyE_06	AbyE_07	Detected QTL
11	72	AX-111093303	AX-109338052	15.005	7.3324	7.6726	9.2277	5.8926	3.3351	-0.0614	0.0345	-0.0018	-0.0282	-0.032	-0.0329	-0.0369	0.0974	QSd.sau-2SY-2D
20	5	AX-111233094	AX-109110130	7.2287	3.621	3.6077	3.9003	2.8168	1.0834	-0.0432	0.0042	-0.0328	-0.0109	-0.0221	-0.0002	0.0043	0.0574
23	57	AX-109362376	AX-108878364	7.1061	3.2886	3.8174	3.5983	2.5596	1.0387	-0.0404	-0.0069	-0.0063	-0.0188	-0.0179	-0.0229	0.0178	0.0551
34	84	AX-111511322	AX-110483331	12.1969	6.0456	6.1512	6.6326	4.4483	2.1844	0.0537	-0.0318	-0.0414	0.0554	-0.0191	0.0574	-0.0219	0.0013
34	102	AX-110518554	AX-110442528	29.7185	19.1353	10.5832	20.9732	16.1628	4.8104	0.1014	-0.0042	0.0478	-0.076	0.0561	-0.0646	0.0714	-0.0305	QSd.sau-2SY-7A.2
PVE, phenotype variance explained
LOD, logarithm of odds
ADD, additive effect of a QTL
LOD (A): LOD score for additive and dominance effects.
LOD (A by E): LOD score for additive and dominance by environment effects.
PVE (A): Phenotypic variation explained by additive and dominance effect at the current scanning position.
PVE (A by E): Phenotypic variation explained by additive and dominance by environment effect at the current scanning position.
Estimated additive effect of QTL at the current scanning position for each environment.

## Sheet: Sheet2
Supplementary Table 4b QTL detected by the QTL-by-Environment interaction module in the AM population
Chromosome	Position	LeftMarker	RightMarker	LOD	LOD(A)	LOD(AbyE)	PVE	PVE(A)	PVE(AbyE)	Add	AbyE_01	AbyE_02	AbyE_03	AbyE_04	AbyE_05	AbyE_06	AbyE_07	AbyE_08	Detected QTL
5	114	AX-111451573	AX-111508275	7.3061	4.9014	2.4048	1.2854	1.056	0.2294	-0.0327	-0.0133	-0.0004	0.0022	-0.0222	0.0237	0.0172	-0.0158	0.0085
5	162	AX-110021952	AX-110503841	9.1782	4.2074	4.9709	1.6167	0.9297	0.687	-0.0302	-0.0138	0.0309	-0.0517	0.0026	0.0091	0.0304	-0.0202	0.0126
5	164	AX-111056340	AX-109829013	38.5433	11.5332	27.0102	32.3907	2.6055	29.7852	0.0505	-0.0924	-0.0433	-0.0438	-0.0731	-0.0507	0.4498	-0.0865	-0.0601
5	166	AX-110035703	AX-111076855	54.9388	48.4598	6.479	49.6182	12.2845	37.3338	-0.1098	0.0607	0.0289	0.1041	0.0704	0.0865	-0.5031	0.062	0.0905	QSd.sau-AM-5A.2
7	86	AX-108740541	AX-110090057	8.746	5.66	3.086	1.6396	1.1863	0.4533	0.0343	0.0212	-0.0158	-0.0231	-0.0218	0.0328	-0.0107	-0.0077	0.0252
7	107	AX-109860028	AX-109624261	7.3031	4.8602	2.4429	1.6935	1.0602	0.6333	0.0322	0.0091	-0.0093	-0.0281	0.041	0.0303	-0.0212	0.0081	-0.0299
11	49	AX-109393346	AX-110548993	9.128	4.9022	4.2258	1.7922	1.0664	0.7257	0.0333	0.0236	-0.0242	-0.0061	0.005	-0.0255	0.0142	0.0505	-0.0375
13	41	AX-109330727	AX-111107210	12.8635	9.7049	3.1586	2.7556	2.1025	0.6532	0.0455	-0.0146	-0.0394	-0.0046	0.0016	-0.0077	0.0369	-0.0139	0.0417
15	155	AX-110936825	AX-109955661	10.5483	7.4302	3.1182	1.9688	1.6243	0.3445	-0.0399	0.01	0.008	0.0038	-0.029	0.0142	0.0188	-0.0329	0.007	QSd.sau-AM-7B
15	162	AX-108799694	AX-108729461	7.6231	6.2864	1.3367	1.5929	1.3435	0.2494	-0.0364	-0.0037	0.004	-0.0042	-0.0271	0.0006	-0.0082	0.0328	0.0059
15	170	AX-110520191	AX-95684576	8.5781	7.4198	1.1583	1.8645	1.5889	0.2757	-0.0395	0.006	-0.0007	0.0018	-0.0165	-0.0015	-0.026	0.0341	0.0029
PVE, phenotype variance explained
LOD, logarithm of odds
ADD, additive effect of a QTL
LOD (A): LOD score for additive and dominance effects.
LOD (A by E): LOD score for additive and dominance by environment effects.
PVE (A): Phenotypic variation explained by additive and dominance effect at the current scanning position.
PVE (A by E): Phenotypic variation explained by additive and dominance by environment effect at the current scanning position.
Estimated additive effect of QTL at the current scanning position for each environment.
